# Supplementary material for: Effect of Water Microsolvation on the Excited-State Proton Transfer of 3-Hydroxyflavone Enclosed in γ-Cyclodextrin
Source: PubMed Central journal article supplement (PMC7914428; doi:10.3390/molecules26040843), 2021-02-05
Supplement: molecules-26-00843-s001.pdf [file molecules-26-00843-s001.pdf]

Supplementary Materials

# Effect of Water Microsolvation on Excited-State Proton Transfer of 3-Hydroxyflavone Enclosed in $\gamma$ -Cyclodextrin

Khanittha Kerdpol <sup>1</sup>, Rathawat Daengngern <sup>2,3</sup>, Chanchai Sattayanon <sup>4</sup>, Supawadee Namuangruk <sup>4</sup>, Thanyada Rungrotmongkol <sup>5,6,7</sup>, Peter Wolschann <sup>8,9</sup>, Nawe Kungwan <sup>10,11,\*</sup> and Supot Hannongbua <sup>1,7,\*</sup>

<sup>1</sup> Center of Excellence in Computational Chemistry (CECC), Department of Chemistry, Faculty of Science, Chulalongkorn University, Bangkok 10330, Thailand

<sup>2</sup> Department of Chemistry, Faculty of Science, King Mongkut's Institute of Technology Ladkrabang, Bangkok 10520, Thailand

<sup>3</sup> Integrated Applied Chemistry Research Unit, Faculty of Science, King Mongkut's Institute of Technology Ladkrabang, Bangkok 10520, Thailand

<sup>4</sup> National Nanotechnology Center (NANOTEC), NSTDA, 111 Thailand Science Park, Pahonyothin Road, Klong Luang, Pathum Thani 12120, Thailand

<sup>5</sup> Structural and Computational Biology Research Unit, Department of Biochemistry, Faculty of Science, Chulalongkorn University, Bangkok 10330, Thailand

<sup>6</sup> Program in Bioinformatics and Computational Biology, Graduate School, Chulalongkorn University, Bangkok 10330, Thailand

<sup>7</sup> Molecular Sensory Science Center, Faculty of Science, Chulalongkorn University, Bangkok 10330, Thailand

<sup>8</sup> Department of Pharmaceutical Chemistry, University of Vienna, 1090 Vienna, Austria

<sup>9</sup> Institute of Theoretical Chemistry, University of Vienna, 1090 Vienna, Austria

<sup>10</sup> Department of Chemistry, Faculty of Science, Chiang Mai University, Chiang Mai 50200, Thailand

<sup>11</sup> Center of Excellence in Materials Science and Technology, Chiang Mai University, Chiang Mai 50200, Thailand

\* Correspondence: naweekung@gmail.com (N.K.); supot.h@chula.ac.th (S.H.);  
Fax: +66-53-892277 (N.K.); Fax: +66-22-187598 (S.H.)

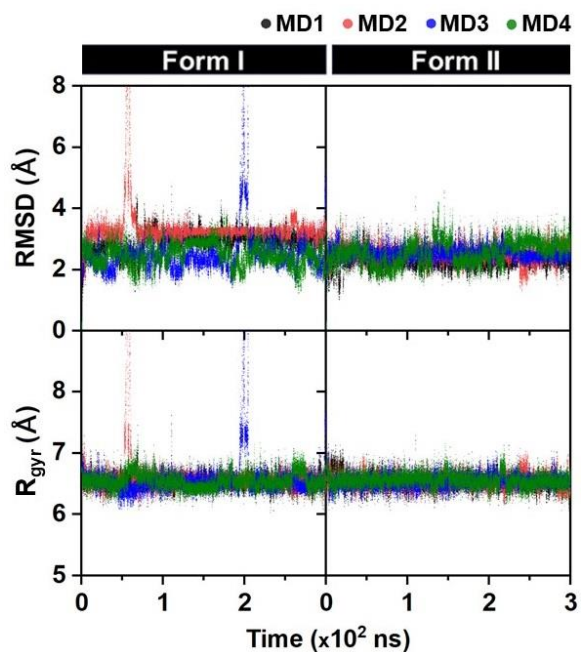

**Figure S1.** RMSD plots for all atoms and  $R_{\text{gyr}}$  of the two orientations of C-ring insertion (Form I), and P-ring insertion (Form II) inclusion complexes for four different MD runs of each system.

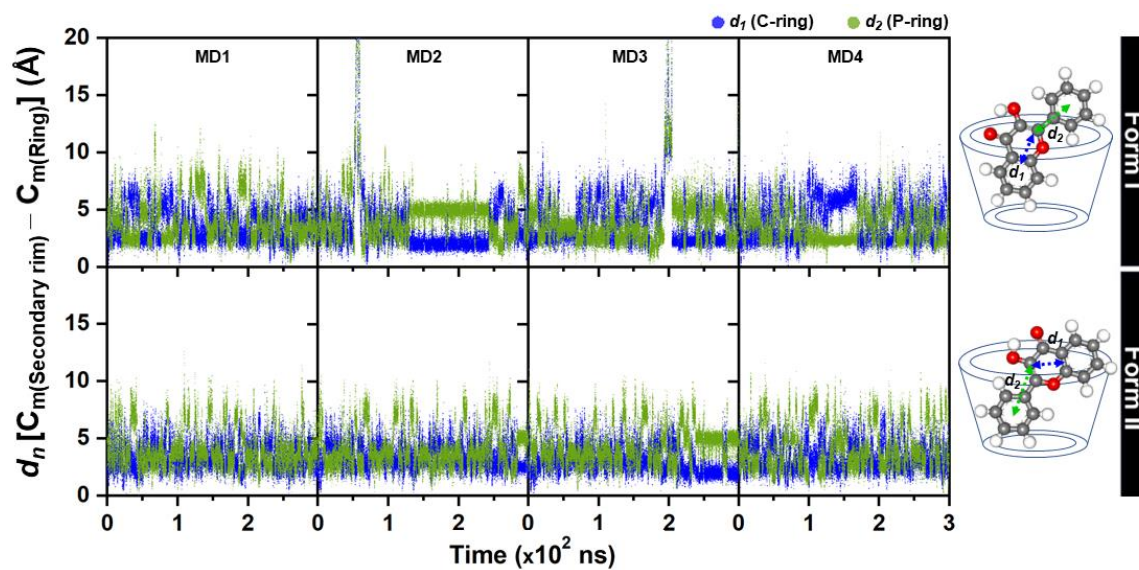

**Figure S2.** The plots of distance measured from the  $C_m$  of each 3HF ring to the  $C_m$  of the secondary rim of  $\gamma$ -CD (all 7 O2 atoms) for the four MD simulations MD1-MD4 with different initial structures of complexes in Form I and Form II.

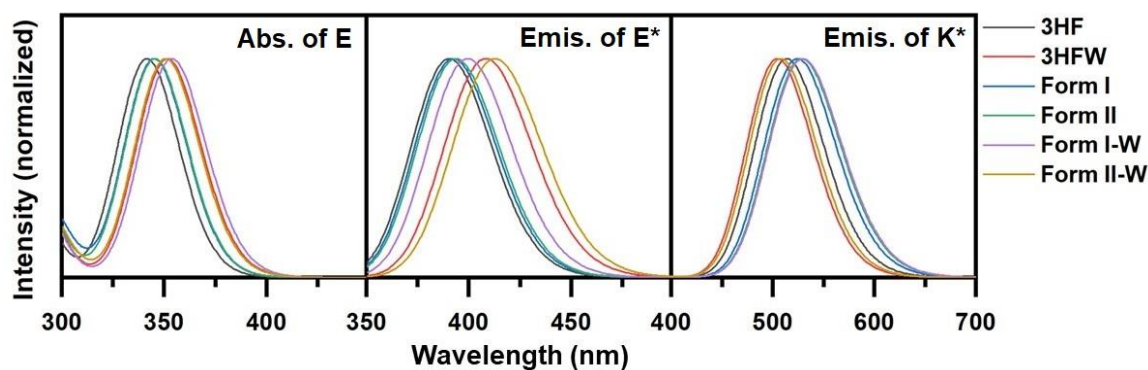

**Figure S3.** The simulated absorption spectra of E, and the simulated emission spectra of E\* and K\* for all studied compounds computed at TD-PBE0/def2-SVP level of theory.

**Table S1.** Electron density  $\rho(\mathbf{r})$ , the Lagrangian kinetic energy  $G(\mathbf{r})$ , potential energy density  $V(\mathbf{r})$ , the Hamiltonian kinetic energy density  $H(\mathbf{r})$ , the Laplacian of the electron density  $\nabla^2\rho(\mathbf{r})$ , the electron delocalization index (DI), and hydrogen-bonded energy ( $E_{\text{HB}}$ ) at selected BCPs in the  $S_1$  state (a.u.) for all compounds.

| Cluster   | BCPs    | $\rho(\mathbf{r})$ | $G(\mathbf{r})$ | $V(\mathbf{r})$ | $H(\mathbf{r})$ | $\nabla^2\rho(\mathbf{r})$ | DI     | $E_{\text{HB}}$ |
|-----------|---------|--------------------|-----------------|-----------------|-----------------|----------------------------|--------|-----------------|
| 3HF       | O2...H1 | 0.0516             | 0.0418          | -0.0448         | -0.0031         | 0.1549                     | 0.6756 | 0.0224          |
| 3HFW      | Ow...H1 | 0.1007             | 0.0764          | -0.1298         | -0.0534         | 0.0918                     | 0.0054 | 0.0649          |
|           | O2...Hw | 0.0633             | 0.0538          | -0.0634         | -0.0096         | 0.1769                     | 0.1481 | 0.0317          |
| Form I    | O2...H1 | 0.0414             | 0.0342          | -0.0350         | -0.0009         | 0.1330                     | 0.0826 | 0.0175          |
| Form II   | O2...H1 | 0.0249             | 0.0218          | -0.0221         | -0.0003         | 0.0860                     | 0.0346 | 0.0111          |
| Form I-W  | Ow...H1 | 0.0575             | 0.0435          | -0.0505         | -0.0070         | 0.1461                     | 0.0000 | 0.0253          |
|           | O2...Hw | 0.0636             | 0.0553          | -0.0646         | -0.0093         | 0.1837                     | 0.0159 | 0.0323          |
| Form II-W | Ow...H1 | 0.1052             | 0.0785          | -0.1391         | -0.0606         | 0.0717                     | 0.0077 | 0.0696          |
|           | O2...Hw | 0.0618             | 0.0528          | -0.0612         | -0.0084         | 0.1774                     | 0.0000 | 0.0306          |
